# Supplementary material for: Titanium implants trigger extra-periodontal T cell-mediated immunity
Source: Royal Society of Chemistry journal article supplement (doi:10.1039/d4bm00246f), 2025-01-01
Supplement: d4bm00246f1.pdf [file d4bm00246f1.pdf]

Supplementary Figures

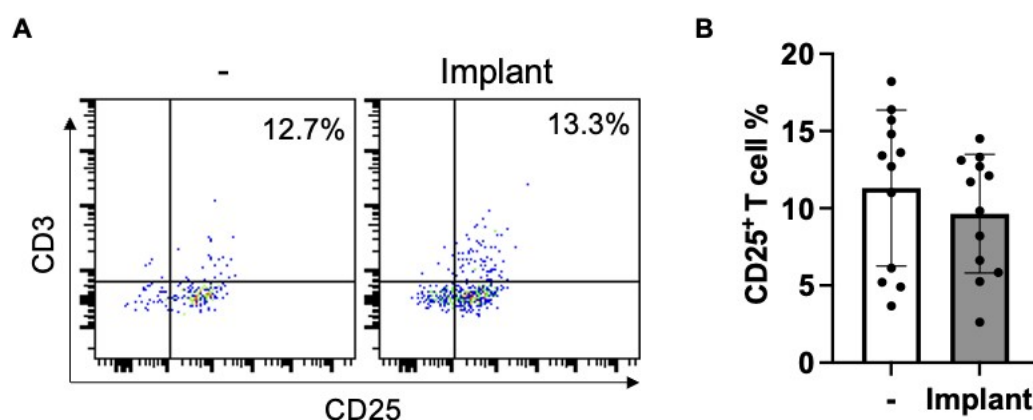

**Supplementary Figure 1. The frequency of activated T cells was comparable in gingival tissues with or without implant placement.** (A) Representative and (B) pooled data of activated T cells as assessed in gingival tissues harvested from the sham groups and peri-implant tissues harvested from the implant groups by flow cytometry. The analysis involved gating CD3<sup>+</sup> and CD25<sup>+</sup> cells within the CD45<sup>+</sup> cell population. Data were presented as mean  $\pm$  SD.

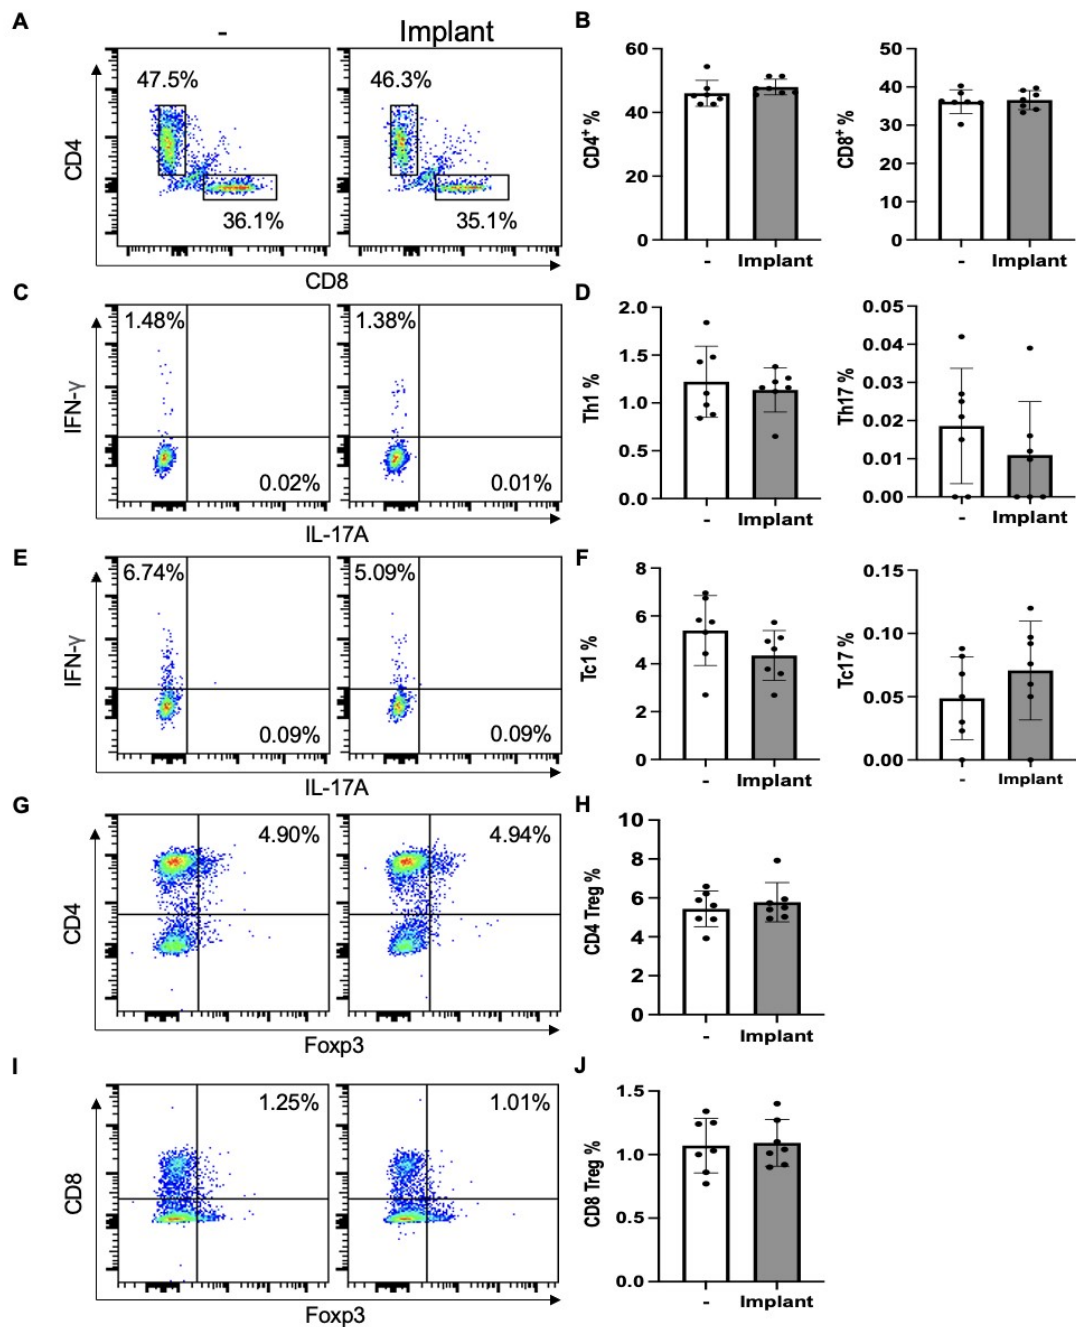

**Supplementary Figure 2. T cell frequency and differentiation were comparable in splenocytes of mice with or without implant placement.** (A) Representative and (B) pooled data ( $n = 7$ ) of the frequency of CD4<sup>+</sup> and CD8<sup>+</sup> T cells in the harvested splenocytes. (C) Representative and (D) pooled data ( $n = 7$ ) of Th1 and Th17 CD4<sup>+</sup> T cells. (E) Representative and (F) pooled ( $n = 7$ ) data of Tc1 and Tc17 CD8<sup>+</sup> T cells. (G) Splenocytes were harvested and the presence of inflammatory T subpopulations was determined with surface staining of first anti-CD3, anti-CD4 and anti-CD8 first and then intracellular staining of anti-IFN- $\gamma$  and anti-IL-17A after PMA/ionomycin stimulation for 6 hours. Spleen-derived cells that underwent staining were identified using flow cytometry. Representative and (H) pooled data ( $n = 7$ ) of regulatory CD4<sup>+</sup>

T cells (CD4<sup>+</sup> Tregs). (I) Representative and (J) pooled data (n = 7) of CD8<sup>+</sup> Tregs. Spleen-derived cells underwent surface staining of CD3, CD4 and CD8, and then intracellular staining of Foxp3. The presence of CD4<sup>+</sup> or CD8<sup>+</sup> Tregs were determined using flow cytometry through gating first CD3<sup>+</sup> and then CD4<sup>+</sup>/Foxp3<sup>+</sup> or CD8<sup>+</sup>/Foxp3<sup>+</sup>. Data were presented as mean  $\pm$  SD.
